# Supplementary material for: Using Multiple Indices for the Water Resource Management of a Monomictic Man-Made Dam in Southern Africa
Source: MDPI journal article supplement (doi:10.3390/w14213366), 2022-10-23
Supplement: s1 [file s1]

## Using multiple indices for water resource management of a monomictic man-made dam in Southern Africa

**Table S1:** Mean annual of water quality for the Roodeplaai Dam and the compliance status Numerical Limits for the Catchment

| Year               | Chl-a<br>(µg/l) | PO <sub>4</sub> (mg/l) | NH <sub>4</sub> (mg/l) | NO <sub>2</sub> +NO <sub>3</sub><br>(mg/l) | pH         |
|--------------------|-----------------|------------------------|------------------------|--------------------------------------------|------------|
| 2001               | 34,6            | 0,2                    | 0,3                    | 0,6                                        | 8,9        |
| 2002               | 49,7            | 0,2                    | 0,3                    | 0,6                                        | 9,0        |
| 2003               | 41,1            | 0,1                    | 0,1                    | 0,4                                        | 8,8        |
| 2004               | 50,1            | 0,2                    | 0,3                    | 0,8                                        | 8,8        |
| 2005               | 67,0            | 0,1                    | 0,2                    | 0,6                                        | 8,5        |
| 2006               | 36,6            | 0,2                    | 0,2                    | 0,8                                        | 8,3        |
| 2007               | 200,6           | 0,2                    | 0,6                    | 0,7                                        | 8,3        |
| 2008               | 96,5            | 0,1                    | 0,3                    | 0,9                                        | 8,2        |
| 2009               | 78,7            | 0,2                    | 0,2                    | 0,8                                        | 8,2        |
| 2010               | 62,0            | 0,2                    | 0,3                    | 0,8                                        | 8,3        |
| 2011               | 41,3            | 0,1                    | 0,4                    | 1,1                                        | 8,3        |
| 2012               | 61,0            | 0,1                    | 0,4                    | 1,3                                        | 8,5        |
| 2013               | 44,3            | 0,2                    | 1,2                    | 1,7                                        | 8,5        |
| 2014               | 49,8            | 0,2                    | 0,8                    | 1,8                                        | 8,6        |
| 2015               | 52,5            | 0,2                    | 0,8                    | 1,5                                        | 8,6        |
| 2016               | 68,0            | 0,4                    | 1,0                    | 2,0                                        | 8,5        |
| 2017               | 37,7            | 0,6                    | 1,3                    | 3,7                                        | 8,2        |
| 2018               | 56,1            | 0,6                    | 1,3                    | 2,6                                        | 8,6        |
| 2019               | 269,6           | No Samples             | No Samples             | No Samples                                 | No Samples |
| 2020               | 47,1            | 0,8                    | 1,1                    | 5,4                                        | 8,4        |
| 2021               | 44,3            | 1,0                    | 2,5                    | 3,5                                        | No Samples |
| Numerical<br>limit | 30              | 0,025                  | 1,25                   | 1                                          | 8,5        |
| % exceedance       | 100             | 95                     | 14                     | 48                                         | 33         |
