# Supplementary material for: Using Multiple Indices for the Water Resource Management of a Monomictic Man-Made Dam in Southern Africa
Source: MDPI journal article supplement (doi:10.3390/w14213366), 2022-10-23
Supplement: s1 [file s1]

**Using multiple indices for water resource management of a monomictic man-made dam in Southern Africa****Table S3:** Expanded Results of Trophic State as per Trophic Level Index

| Year | TLI - TP ( $\mu\text{g/l}$ ) | TLI - Chl-a ( $\mu\text{g/l}$ ) | TLI - TN ( $\mu\text{g/l}$ ) | TLI - SD (m)      | Trophic Level     | Status       |
|------|------------------------------|---------------------------------|------------------------------|-------------------|-------------------|--------------|
| 2001 | 4,20                         | 6,95                            | 6,18                         | 6,19              | 5,88              | Eutrophic    |
| 2002 | 4,26                         | 7,02                            | 6,60                         | 6,47              | 6,09              | Hypertrophic |
| 2003 | 4,23                         | 6,85                            | 6,83                         | 6,29              | 6,05              | Hypertrophic |
| 2004 | 4,17                         | 6,81                            | 6,40                         | 6,63              | 6,01              | Hypertrophic |
| 2005 | 4,36                         | 6,84                            | 7,24                         | 6,37              | 6,20              | Hypertrophic |
| 2006 | 4,20                         | 7,07                            | 6,82                         | 6,45              | 6,14              | Hypertrophic |
| 2007 | 4,30                         | 7,87                            | 8,68                         | 7,26              | 7,03              | Hypertrophic |
| 2008 | 4,22                         | 7,06                            | 8,66                         | 6,51              | 6,61              | Hypertrophic |
| 2009 | 4,34                         | 6,76                            | 6,75                         | 6,44              | 6,07              | Hypertrophic |
| 2010 | 4,24                         | 7,13                            | 7,06                         | 6,79              | 6,31              | Hypertrophic |
| 2011 | 4,24                         | 6,67                            | 6,58                         | 6,88              | 6,09              | Hypertrophic |
| 2012 | 4,86                         | 6,68                            | 6,85                         | 7,05              | 6,36              | Hypertrophic |
| 2013 | 4,06                         | 6,93                            | 6,23                         | 7,57              | 6,20              | Hypertrophic |
| 2014 | 4,31                         | 7,15                            | 7,15                         | 7,49              | 6,53              | Hypertrophic |
| 2015 | 4,42                         | 7,71                            | 7,02                         | 7,41              | 6,64              | Hypertrophic |
| 2016 | 4,86                         | 8,40                            | 7,43                         | 7,75              | 7,11              | Hypertrophic |
| 2017 | 4,26                         | 8,66                            | 6,74                         | 8,11              | 6,94              | Hypertrophic |
| 2018 | 4,50                         | 8,61                            | 6,93                         | 8,05              | 7,02              | Hypertrophic |
| 2019 | 4,77                         | Insufficient data               | 9,96                         | Insufficient data | Insufficient data | Hypertrophic |
| 2020 | 5,90                         | 9,88                            | 7,23                         | 8,04              | 7,76              | Hypertrophic |
| 2021 | Insufficient data            | 9,15                            | 7,37                         | 8,13              | Insufficient data | Hypertrophic |
