# Supplementary material for: Using Multiple Indices for the Water Resource Management of a Monomictic Man-Made Dam in Southern Africa
Source: MDPI journal article supplement (doi:10.3390/w14213366), 2022-10-23
Supplement: s1 [file s1]

**Using multiple indices for water resource management of a monomictic man-made dam in Southern Africa****Table S2:** Expanded Results of Trophic State as per Carlson Index

| Year | TSI - TP<br>(µg/l)   | TSI - Chl-a<br>(µg/l) | TSI - SD (m) | Trophic Index | Trophic Status |
|------|----------------------|-----------------------|--------------|---------------|----------------|
| 2001 | 81,22                | 65,82                 | 49,23        | <b>65,42</b>  | Eutrophic      |
| 2002 | 82,04                | 69,57                 | 50,05        | <b>67,22</b>  | Eutrophic      |
| 2003 | 80,03                | 71,57                 | 49,60        | <b>67,07</b>  | Eutrophic      |
| 2004 | 79,66                | 67,78                 | 48,98        | <b>65,47</b>  | Eutrophic      |
| 2005 | 79,93                | 75,22                 | 51,20        | <b>68,78</b>  | Eutrophic      |
| 2006 | 82,61                | 71,52                 | 49,35        | <b>67,83</b>  | Eutrophic      |
| 2007 | 91,80                | 88,07                 | 50,46        | <b>76,78</b>  | Hypertrophic   |
| 2008 | 82,49                | 87,84                 | 49,59        | <b>73,30</b>  | Hypertrophic   |
| 2009 | 79,06                | 70,93                 | 50,99        | <b>66,99</b>  | Eutrophic      |
| 2010 | 83,29                | 73,63                 | 49,75        | <b>68,89</b>  | Eutrophic      |
| 2011 | 78,05                | 69,35                 | 49,74        | <b>65,71</b>  | Eutrophic      |
| 2012 | 78,09                | 71,75                 | 57,34        | <b>69,06</b>  | Eutrophic      |
| 2013 | 80,99                | 66,23                 | 47,65        | <b>64,96</b>  | Eutrophic      |
| 2014 | 83,57                | 74,41                 | 50,61        | <b>69,53</b>  | Eutrophic      |
| 2015 | 89,94                | 73,31                 | 51,97        | <b>71,74</b>  | Hypertrophic   |
| 2016 | 97,78                | 76,95                 | 57,40        | <b>77,38</b>  | Hypertrophic   |
| 2017 | 100,82               | 70,78                 | 50,01        | <b>73,87</b>  | Hypertrophic   |
| 2018 | 100,22               | 72,52                 | 52,93        | <b>75,22</b>  | Hypertrophic   |
| 2019 | Insufficient<br>Data | 99,44                 | 56,32        |               | Hypertrophic   |
| 2020 | 114,82               | 75,20                 | 70,35        | <b>86,79</b>  | Hypertrophic   |
| 2021 | 106,43               | 76,37                 |              |               | Hypertrophic   |
